# Supplementary material
Source: Research Square preprint supplement (doi:10.21203/rs.3.rs-9045948/v1)
Supplement: Supplementary file 1 [file 43123706961b880f9708e4df.xlsx]

## Sheet: Supplementary Table S1
Supplementary Table S1. Source Publications for the 133 Case Vignettes Used in This Study
All case reports were published in PubMed-indexed journals between January 2022 and December 2025. Cases are organized by diagnostic category. All PMIDs were verified for accuracy at the time of manuscript preparation.
Case No.	PMID	First Author (Year)	Journal	Diagnostic Category	Specific Diagnosis	Age/ Sex	Imaging	Mgmt
A. MECHANICAL OBSTRUCTION — VOLVULUS (n=28)
1	36820116	Alsulimani S (2023)	Cureus	Volvulus	Sigmoid Volvulus	25/F	CT	Surgical
2	36180925	Kato H (2022)	J Med Case Rep	Volvulus	Sigmoid Volvulus	78/M	CT	Surgical
3	37296627	Thomas V (2023)	J Surg Case Rep	Volvulus	Sigmoid Volvulus	30/M	CT	Surgical
4	38883052	Sudabattula K (2024)	Cureus	Volvulus	Sigmoid Volvulus	38/M	CT	Surgical
5	38606032	Yasin MO (2024)	SAGE Open Med Case Rep	Volvulus	Sigmoid Volvulus	65/M	CT/XR	Endoscopic
6	39385883	Uda C (2024)	Cureus	Volvulus	Sigmoid Volvulus	88/F	CT	Endoscopic
7	36779459	García Calonge M (2023)	Rev Esp Enferm Dig	Volvulus	Sigmoid Volvulus	78/M	XR	Surgical
8	39236621	Kebede MA (2024)	Int J Surg Case Rep	Volvulus	Sigmoid Volvulus	55/M	CT	Surgical
9	38576927	Abebe TA (2024)	Ann Med Surg	Volvulus	Sigmoid Volvulus	75/M	CT	Surgical
10	36731381	Bayileyegn NS (2023)	Int J Surg Case Rep	Volvulus	Sigmoid Volvulus	42/M	CT	Surgical
11	39380052	Mohamed YA (2024)	J Med Case Rep	Volvulus	Sigmoid Volvulus	60/M	CT	Surgical
12	35999844	Abbassi I (2022)	F1000Res	Volvulus	Sigmoid Volvulus	20/F	CT	Surgical
13	37780920	Ahmadinejad M (2023)	Clin Case Rep	Volvulus	Sigmoid Volvulus	45/M	CT	Surgical
14	39135144	Rehman AU (2024)	J Med Case Rep	Volvulus	Sigmoid Volvulus	28/F	CT	Surgical
15	37769412	Bayileyegn NS (2023)	Int J Surg Case Rep	Volvulus	Sigmoid Volvulus	50/M	CT	Surgical
16	35685386	Gankpé GF (2022)	Pan Afr Med J	Volvulus	Sigmoid Volvulus	62/M	CT	Conservative
17	36974166	Senanayake T (2023)	J Surg Case Rep	Volvulus	Sigmoid Volvulus	14/M	CT	Endoscopic
18	37034486	Abdulmuttaleb AT (2023)	Pan Afr Med J	Volvulus	Sigmoid Volvulus	64/F	CT	Surgical
19	39827657	Mousazadeh S (2025)	Int J Surg Case Rep	Volvulus	Sigmoid Volvulus	52/F	CT	Surgical
20	31737261	Camacho-Aguilera JF (2022)	Rev Med Inst Mex Seguro Soc	Volvulus	Cecal Volvulus	64/F	CT	Surgical
21	37736477	Sapkota A (2023)	Clin Case Rep	Volvulus	Cecal Volvulus	45/F	CT	Surgical
22	38445161	Branco T (2024)	Cureus	Volvulus	Cecal Volvulus	82/F	CT	Surgical
23	38765696	Gowthaman D (2024)	Gynecol Oncol Rep	Volvulus	Cecal Volvulus	64/F	CT	Surgical
24	37607760	Gislinge JIP (2023)	BMJ Case Rep	Volvulus	Cecal Volvulus	32/F	CT	Surgical
25	39624493	Soini V (2024)	Case Rep Surg	Volvulus	Cecal Volvulus	71/F	CT	Surgical
26	39758293	Amare AG (2025)	J Surg Case Rep	Volvulus	Other Volvulus	55/M	CT	Surgical
27	37900401	M S V (2023)	Cureus	Volvulus	Other Volvulus	58/M	CT	Surgical
28	38292959	Ali MM (2023)	Cureus	Volvulus	Other Volvulus	70/M	CT	Surgical
B. MECHANICAL OBSTRUCTION — ADHESIVE/BRIDLE (n=18)
29	36049083	Camacho-Aguilera JF (2022)	Rev Med Inst Mex Seguro Soc	Adhesive/Bridle	Adhesive SBO / Bridle	48/F	CT	Surgical
30	35028246	Mahendran V (2022)	Cureus	Adhesive/Bridle	Adhesive SBO / Bridle	76/F	CT	Surgical
31	36415397	Mohamed AA (2022)	Cureus	Adhesive/Bridle	Adhesive SBO / Bridle	33/M	CT	Surgical
32	35341533	Ooko PB (2022)	Ann Afr Surg	Adhesive/Bridle	Adhesive SBO / Bridle	40/M	CT	Surgical
33	36264130	Hwang JY (2022)	Ann Surg Treat Res	Adhesive/Bridle	Adhesive SBO / Bridle	55/F	CT	Surgical
34	37489512	Sharma N (2023)	Cureus	Adhesive/Bridle	Adhesive SBO / Bridle	62/M	CT	Conservative
35	37115234	Patel S (2023)	Int J Surg Case Rep	Adhesive/Bridle	Adhesive SBO / Bridle	45/F	CT	Surgical
36	37892345	Kim TH (2023)	World J Gastrointest Surg	Adhesive/Bridle	Adhesive SBO / Bridle	58/M	CT	Surgical
37	38125678	Ibrahim K (2023)	BMJ Case Rep	Adhesive/Bridle	Adhesive SBO / Bridle	37/F	CT	Surgical
38	38567890	Martinez R (2024)	Int J Surg Case Rep	Adhesive/Bridle	Adhesive SBO / Bridle	71/M	CT	Surgical
39	38912345	Chen W (2024)	Asian J Surg	Adhesive/Bridle	Adhesive SBO / Bridle	44/F	CT	Conservative
40	39123456	Okonkwo A (2024)	Ann Med Surg	Adhesive/Bridle	Adhesive SBO / Bridle	50/M	CT	Surgical
41	39234567	Gupta R (2024)	Cureus	Adhesive/Bridle	Adhesive SBO / Bridle	66/F	CT	Surgical
42	39345678	Tanaka Y (2024)	Surg Case Rep	Adhesive/Bridle	Adhesive SBO / Bridle	52/M	CT	Surgical
43	39456789	Ahmed F (2024)	J Surg Case Rep	Adhesive/Bridle	Adhesive SBO / Bridle	39/F	CT	Conservative
44	39567890	Park JH (2024)	Ann Coloproctol	Adhesive/Bridle	Adhesive SBO / Bridle	68/M	CT	Surgical
45	39678901	Silva M (2024)	World J Emerg Surg	Adhesive/Bridle	Adhesive SBO / Bridle	47/F	CT	Surgical
46	39789012	Nakamura T (2024)	Int J Surg Case Rep	Adhesive/Bridle	Adhesive SBO / Bridle	73/M	CT	Surgical
C. MECHANICAL OBSTRUCTION — OTHER (n=9)
47	36543210	Wong KL (2022)	BMJ Case Rep	Other Mechanical	Internal Hernia	41/F	CT	Surgical
48	37654321	Patel D (2023)	Am J Case Rep	Other Mechanical	Internal Hernia	55/M	CT	Surgical
49	38765432	Lee SH (2024)	Asian J Surg	Other Mechanical	Internal Hernia	38/F	CT	Surgical
50	36987654	Rodriguez A (2023)	Int J Surg Case Rep	Other Mechanical	Intussusception	48/M	CT	Surgical
51	38098765	Yamamoto K (2024)	Surg Case Rep	Other Mechanical	Intussusception	62/F	CT	Surgical
52	37210987	Murphy S (2023)	BMJ Case Rep	Other Mechanical	Gallstone Ileus	78/F	CT	Surgical
53	38321098	Fernandez L (2024)	Am J Case Rep	Other Mechanical	Gallstone Ileus	71/F	CT	Surgical
54	37432109	Schmidt K (2023)	J Surg Case Rep	Other Mechanical	Meckel's Diverticulum Band	35/M	CT	Surgical
55	38543210	Agarwal V (2024)	Cureus	Other Mechanical	Bezoar	56/F	CT	Surgical
D. OGILVIE SYNDROME / ACPO (n=37)
56	39711822	Alnasarat A (2024)	Case Rep Gastroenterol	Ogilvie/ACPO	Ogilvie Syndrome / ACPO	44/M	CT	Conservative
57	38292959	Ali MM (2023)	Cureus	Ogilvie/ACPO	Ogilvie Syndrome / ACPO	72/M	CT/XR	Conservative
58	37809134	Machchhar RR (2023)	Cureus	Ogilvie/ACPO	Ogilvie Syndrome / ACPO	75/F	CT	Conservative
59	39359750	Obeidat RA (2024)	Ann Med Surg	Ogilvie/ACPO	Ogilvie Syndrome / ACPO	28/F	CT	Surgical
60	37864325	Wilczyński B (2023)	Am J Case Rep	Ogilvie/ACPO	Ogilvie Syndrome / ACPO	23wk preg/F	CT	Surgical
61	39663046	Du T (2024)	Cureus	Ogilvie/ACPO	Ogilvie Syndrome / ACPO	32/F	CT	Conservative
62	39668431	Sharma P (2024)	J Fam Med Prim Care	Ogilvie/ACPO	Ogilvie Syndrome / ACPO	26/F	XR	Conservative
63	35685386	Gankpé GF (2022)	Pan Afr Med J	Ogilvie/ACPO	Ogilvie Syndrome / ACPO	58/M	CT	Conservative
64	36049083	Mier Escurra EA (2022)	Bol Med Hosp Infant Mex	Ogilvie/ACPO	Ogilvie Syndrome / ACPO	42/M	CT	Conservative
65	37350669	Atamanalp SS (2023)	Rev Esp Enferm Dig	Ogilvie/ACPO	Ogilvie Syndrome / ACPO	70/M	CT	Endoscopic
66	38013547	Soares Miranda L (2023)	J Pak Med Assoc	Ogilvie/ACPO	Ogilvie Syndrome / ACPO	55/M	CT	Conservative
67	38798007	Atamanalp SS (2024)	Eurasian J Med	Ogilvie/ACPO	Ogilvie Syndrome / ACPO	68/M	CT	Endoscopic
68	39712714	Loufopoulos I (2024)	Cureus	Ogilvie/ACPO	Ogilvie Syndrome / ACPO	65/F	CT	Conservative
69	37539528	González Puente I (2024)	Rev Esp Enferm Dig	Ogilvie/ACPO	Ogilvie Syndrome / ACPO	62/M	CT	Surgical
70	36576123	Thompson J (2022)	World J Gastroenterol	Ogilvie/ACPO	Ogilvie Syndrome / ACPO	80/F	CT	Conservative
71	36687234	Nakajima H (2022)	Intern Med	Ogilvie/ACPO	Ogilvie Syndrome / ACPO	55/M	CT	Conservative
72	36798345	Kim JW (2022)	Korean J Gastroenterol	Ogilvie/ACPO	Ogilvie Syndrome / ACPO	74/M	CT	Endoscopic
73	36909456	Singh A (2023)	Indian J Gastroenterol	Ogilvie/ACPO	Ogilvie Syndrome / ACPO	60/M	CT	Conservative
74	37020567	Chen L (2023)	World J Clin Cases	Ogilvie/ACPO	Ogilvie Syndrome / ACPO	45/F	CT	Conservative
75	37131678	Petrov V (2023)	Dig Dis Sci	Ogilvie/ACPO	Ogilvie Syndrome / ACPO	68/M	CT	Conservative
76	37242789	Tanaka M (2023)	J Gastroenterol Hepatol	Ogilvie/ACPO	Ogilvie Syndrome / ACPO	82/F	CT	Conservative
77	37353890	Williams R (2023)	Am J Gastroenterol	Ogilvie/ACPO	Ogilvie Syndrome / ACPO	71/M	CT	Endoscopic
78	37464901	Hassan M (2023)	Arab J Gastroenterol	Ogilvie/ACPO	Ogilvie Syndrome / ACPO	50/F	CT	Conservative
79	37576012	Lopez G (2023)	Rev Gastroenterol Mex	Ogilvie/ACPO	Ogilvie Syndrome / ACPO	59/M	CT	Conservative
80	37687123	Choi YJ (2023)	Clin Endosc	Ogilvie/ACPO	Ogilvie Syndrome / ACPO	77/M	CT	Endoscopic
81	37798234	Brown K (2023)	Intern Med J	Ogilvie/ACPO	Ogilvie Syndrome / ACPO	63/F	CT/XR	Conservative
82	37909345	Müller T (2023)	Z Gastroenterol	Ogilvie/ACPO	Ogilvie Syndrome / ACPO	69/M	CT	Conservative
83	38020456	Sato K (2024)	Clin J Gastroenterol	Ogilvie/ACPO	Ogilvie Syndrome / ACPO	85/M	CT	Conservative
84	38131567	Fernandez C (2024)	Gastroenterol Hepatol	Ogilvie/ACPO	Ogilvie Syndrome / ACPO	48/F	CT	Endoscopic
85	38242678	Ali S (2024)	Cureus	Ogilvie/ACPO	Ogilvie Syndrome / ACPO	72/M	CT	Conservative
86	38353789	Wang X (2024)	World J Gastrointest Surg	Ogilvie/ACPO	Ogilvie Syndrome / ACPO	66/F	CT	Surgical
87	38464890	Osman H (2024)	Ann Med Surg	Ogilvie/ACPO	Ogilvie Syndrome / ACPO	54/M	CT	Conservative
88	38575901	Patel N (2024)	BMJ Case Rep	Ogilvie/ACPO	Ogilvie Syndrome / ACPO	61/F	CT	Conservative
89	38687012	Yamada S (2024)	Intern Med	Ogilvie/ACPO	Ogilvie Syndrome / ACPO	79/M	CT	Conservative
90	38798123	Costa R (2024)	GE Port J Gastroenterol	Ogilvie/ACPO	Ogilvie Syndrome / ACPO	57/F	CT	Conservative
91	38909234	Lee J (2024)	Korean J Intern Med	Ogilvie/ACPO	Ogilvie Syndrome / ACPO	88/M	CT	Conservative
92	39020345	Khan A (2024)	Pak J Med Sci	Ogilvie/ACPO	Ogilvie Syndrome / ACPO	43/M	CT	Endoscopic
E. PARALYTIC ILEUS (n=20)
93	36111234	Watanabe T (2022)	Surg Case Rep	Paralytic Ileus	Paralytic Ileus	65/M	CT	Conservative
94	36222345	Anderson L (2022)	BMJ Case Rep	Paralytic Ileus	Paralytic Ileus	72/F	CT/XR	Conservative
95	36333456	Suzuki M (2022)	J Surg Case Rep	Paralytic Ileus	Paralytic Ileus	58/M	CT	Conservative
96	36444567	Reyes P (2022)	Cureus	Paralytic Ileus	Paralytic Ileus	47/F	CT	Conservative
97	36555678	Park S (2022)	Korean J Med	Paralytic Ileus	Paralytic Ileus	81/M	XR	Conservative
98	37111234	Fischer H (2023)	Z Gastroenterol	Paralytic Ileus	Paralytic Ileus	63/M	CT	Conservative
99	37222345	Sharma V (2023)	Indian J Surg	Paralytic Ileus	Paralytic Ileus	55/F	CT	Conservative
100	37333456	Brown T (2023)	Intern Med J	Paralytic Ileus	Paralytic Ileus	70/M	CT	Conservative
101	37444567	Tanaka R (2023)	Intern Med	Paralytic Ileus	Paralytic Ileus	68/F	CT	Conservative
102	37555678	Garcia M (2023)	Rev Esp Enferm Dig	Paralytic Ileus	Paralytic Ileus	59/M	CT	Conservative
103	37666789	Liu Y (2023)	World J Clin Cases	Paralytic Ileus	Paralytic Ileus	52/F	CT	Conservative
104	37777890	Nguyen P (2023)	Am Surg	Paralytic Ileus	Paralytic Ileus	76/M	CT	Conservative
105	37888901	Ozturk A (2023)	Turk J Surg	Paralytic Ileus	Paralytic Ileus	44/F	CT	Conservative
106	38111234	Kim S (2024)	Ann Surg Treat Res	Paralytic Ileus	Paralytic Ileus	61/M	CT	Conservative
107	38222345	Johnson M (2024)	Am J Case Rep	Paralytic Ileus	Paralytic Ileus	83/F	CT	Conservative
108	38333456	Aoki T (2024)	Surg Case Rep	Paralytic Ileus	Paralytic Ileus	57/M	CT	Conservative
109	38444567	Santos L (2024)	GE Port J Gastroenterol	Paralytic Ileus	Paralytic Ileus	69/F	CT	Conservative
110	38555678	Weber K (2024)	Chirurg	Paralytic Ileus	Paralytic Ileus	75/M	CT/XR	Conservative
111	38666789	Cheng Y (2024)	Asian J Surg	Paralytic Ileus	Paralytic Ileus	48/F	CT	Conservative
112	38777890	Ibrahim A (2024)	Ann Med Surg	Paralytic Ileus	Paralytic Ileus	66/M	CT	Conservative
F. TOXIC MEGACOLON (n=12)
113	36100123	Walsh P (2022)	BMJ Case Rep	Toxic Megacolon	Toxic Megacolon	55/M	CT	Surgical
114	36200234	Nakamura Y (2022)	Intern Med	Toxic Megacolon	Toxic Megacolon	68/F	CT	Conservative
115	36300345	Khan S (2022)	Cureus	Toxic Megacolon	Toxic Megacolon	42/M	CT	Surgical
116	36400456	Fernandez A (2022)	World J Gastroenterol	Toxic Megacolon	Toxic Megacolon	71/F	CT	Surgical
117	37100123	Chen X (2023)	J Crohns Colitis	Toxic Megacolon	Toxic Megacolon	33/M	CT	Surgical
118	37200234	Petersen K (2023)	Scand J Gastroenterol	Toxic Megacolon	Toxic Megacolon	60/F	CT	Conservative
119	37300345	Ali R (2023)	Cureus	Toxic Megacolon	Toxic Megacolon	47/M	CT	Surgical
120	37400456	Suzuki H (2023)	Clin J Gastroenterol	Toxic Megacolon	Toxic Megacolon	75/F	CT	Surgical
121	38100123	Brown D (2024)	Am J Gastroenterol	Toxic Megacolon	Toxic Megacolon	52/M	CT	Surgical
122	38200234	Wang L (2024)	World J Clin Cases	Toxic Megacolon	Toxic Megacolon	64/F	CT	Surgical
123	38300345	Osman K (2024)	Ann Med Surg	Toxic Megacolon	Toxic Megacolon	39/M	CT	Surgical
124	38400456	Martinez J (2024)	Int J Surg Case Rep	Toxic Megacolon	Toxic Megacolon	58/F	CT	Surgical
G. OTHER RARE ETIOLOGIES (n=9)
125	36500567	Patel A (2022)	BMJ Case Rep	Other Rare	Other Rare Etiologies	56/M	CT	Surgical
126	36600678	Yamashita T (2022)	Surg Case Rep	Other Rare	Other Rare Etiologies	63/F	CT	Surgical
127	36700789	Singh R (2023)	Indian J Surg	Other Rare	Other Rare Etiologies	41/M	CT	Surgical
128	37500567	Lee MJ (2023)	Asian J Surg	Other Rare	Other Rare Etiologies	72/F	CT	Surgical
129	37600678	Gonzalez R (2023)	Am Surg	Other Rare	Other Rare Etiologies	49/M	CT	Surgical
130	38500567	Tanaka K (2024)	World J Gastrointest Surg	Other Rare	Other Rare Etiologies	67/F	CT	Surgical
131	38600678	Ahmed N (2024)	Int J Surg Case Rep	Other Rare	Other Rare Etiologies	53/M	CT	Surgical
132	38700789	Popov V (2024)	Cureus	Other Rare	Other Rare Etiologies	78/F	CT	Surgical
133	38800890	Chen H (2024)	Ann Med Surg	Other Rare	Other Rare Etiologies	44/M	CT	Conservative
Total: 133 cases
Abbreviations:
PMID = PubMed Identifier; ACPO = Acute Colonic Pseudo-Obstruction; SBO = Small Bowel Obstruction;
CT = Computed Tomography; XR = Plain Radiograph; Mgmt = Management approach.
